# Supplementary material for: How do zinc oxide and zero valent iron nanoparticles impact the occurrence of antibiotic resistance genes in landfill leachate?
Source: Royal Society of Chemistry journal article supplement (doi:10.1039/c9en00068b), 2019-01-01
Supplement: c9en00068b1.pdf [file c9en00068b1.pdf]

Supporting Information (SI)

**How does zinc oxide and zero valent iron nanoparticles impact the occurrence of antibiotic resistance genes in landfill leachate?**

Jianhong Shi<sup>a,b</sup>, Yinglong Su<sup>a,b</sup>, Zhongjian Zhang<sup>a,b</sup>, Huawei Wei<sup>a,b</sup>, Bing Xie<sup>a,b,\*</sup>

*<sup>a</sup> Key Laboratory of Urbanization and Ecological Restoration of Shanghai, School of Ecology and Environmental Science, East China Normal University, Shanghai 200241, China, Tel. +86 021 54341276; email: bxie@des.ecnu.edu.cn*

*<sup>b</sup> Shanghai Institute of Pollution Control and Ecological Security, Shanghai 200092, China*

Table S1 Characteristics of leachate used in NPs exposure studies

|                                            | Leachate   |            |
|--------------------------------------------|------------|------------|
|                                            | M          | O          |
| <b>PH</b>                                  | 8.7(0.08)  | 9.0 (0.12) |
| <b>EC (ms/cm)</b>                          | 28.3(0.6)  | 15.1(0.2)  |
| <b>DOC</b>                                 | 9667(447)  | 1417(57)   |
| <b>TN (mg/L)</b>                           | 5805(145)  | 4943(206)  |
| <b>NH<sub>4</sub><sup>+</sup>-N (mg/L)</b> | 3040(158)  | 1304(49)   |
| <b>TP(mg/L)</b>                            | 43.9 (9.6) | 20.6 (6.7) |
| <b>Zn<sup>2+</sup>(mg/L)</b>               | 0.13(0.01) | 0.04(0.01) |
| <b>Fe<sup>2+</sup>(mg/L)</b>               | 0.68(0.05) | 0.64(0.04) |

The letters “M” and “O” represented the middle-aged and old-aged leachate, respectively. Values in the brackets represent standard deviations of triplicate tests.

Table S2 Primers and PCR conditions for ARG analyses

| Targeted genes             | Amplicon length<br>(bp) | Primer sequences (5' – 3')    | Linearity (R <sup>2</sup> )<br>Efficiency (%) |
|----------------------------|-------------------------|-------------------------------|-----------------------------------------------|
| <i>sul1</i>                | 172                     | FW CACCGGAAACATCGCTGCA        | 0.99                                          |
|                            |                         | RV AAGTTCCGCCCAAGGCT          | 94                                            |
| <i>sul2</i>                | 165                     | FW CTCCGATGGAGGCCGGTAT        | 0.99                                          |
|                            |                         | RV GGAATGCCATCTGCCTTGA        | 92                                            |
| <i>aadA1</i>               | 195                     | FW AGCTAAGCGGAACTGCAAT        | 0.99                                          |
|                            |                         | RV TGGCTCGAAGATACCTGCAA       | 96                                            |
| <i>strB</i>                | 185                     | FW GCTCGGTCGTGAGAACAATCT      | 0.99                                          |
|                            |                         | RV CAATTCGGTCGCCTGGTAGT       | 99                                            |
| <i>ermB</i>                | 139                     | FW AAAACTTACCCGCCATAC CA      | 0.99                                          |
|                            |                         | RV TTTGGCGTGTTCATTGC TT       | 97                                            |
| <i>mefA</i>                | 186                     | FW ATACCCCAG CACTCAATTCG      | 0.99                                          |
|                            |                         | RV CAATCACAGCACCCA ATACG      | 95                                            |
| <i>tetM</i>                | 205                     | FW CCGTTGGGAAGTGGAATGC        | 0.99                                          |
|                            |                         | RV TCCGAAAATCTGCTGGGGTA       | 91                                            |
| <i>tetQ</i>                | 196                     | FW AGAATCTGCTGTTTGCCAGTG      | 0.99                                          |
|                            |                         | RV CGGAGTGTCAATGATATTGCA      | 95                                            |
| <i>bla<sub>CTX-M</sub></i> | 211                     | FW ATGTGCAGYACCAGTAARGTKATGGC | 0.99                                          |
|                            |                         | RV ATCACKCGGRTCGCCNNGGRAT     | 105                                           |
| <i>bla<sub>OXA</sub></i>   | 195                     | FW CGGATGGTTTGAAGGGTTTATTAT   | 0.99                                          |
|                            |                         | RV TCTTGGCTTTTATGCTTGATGTAA   | 95                                            |
| <i>Int1</i>                | 190                     | FW GGCTTCGTGATGCCTGCTT        | 0.99                                          |
|                            |                         | RV CATTCTGGCCGTGGTTCT         | 105                                           |
| <i>Int2</i>                | 143                     | FW GTTATTTTATTGCTGGGATTAGGC   | 0.99                                          |
|                            |                         | RV TTTTACGCTGCTGTATGGTGC      | 97                                            |



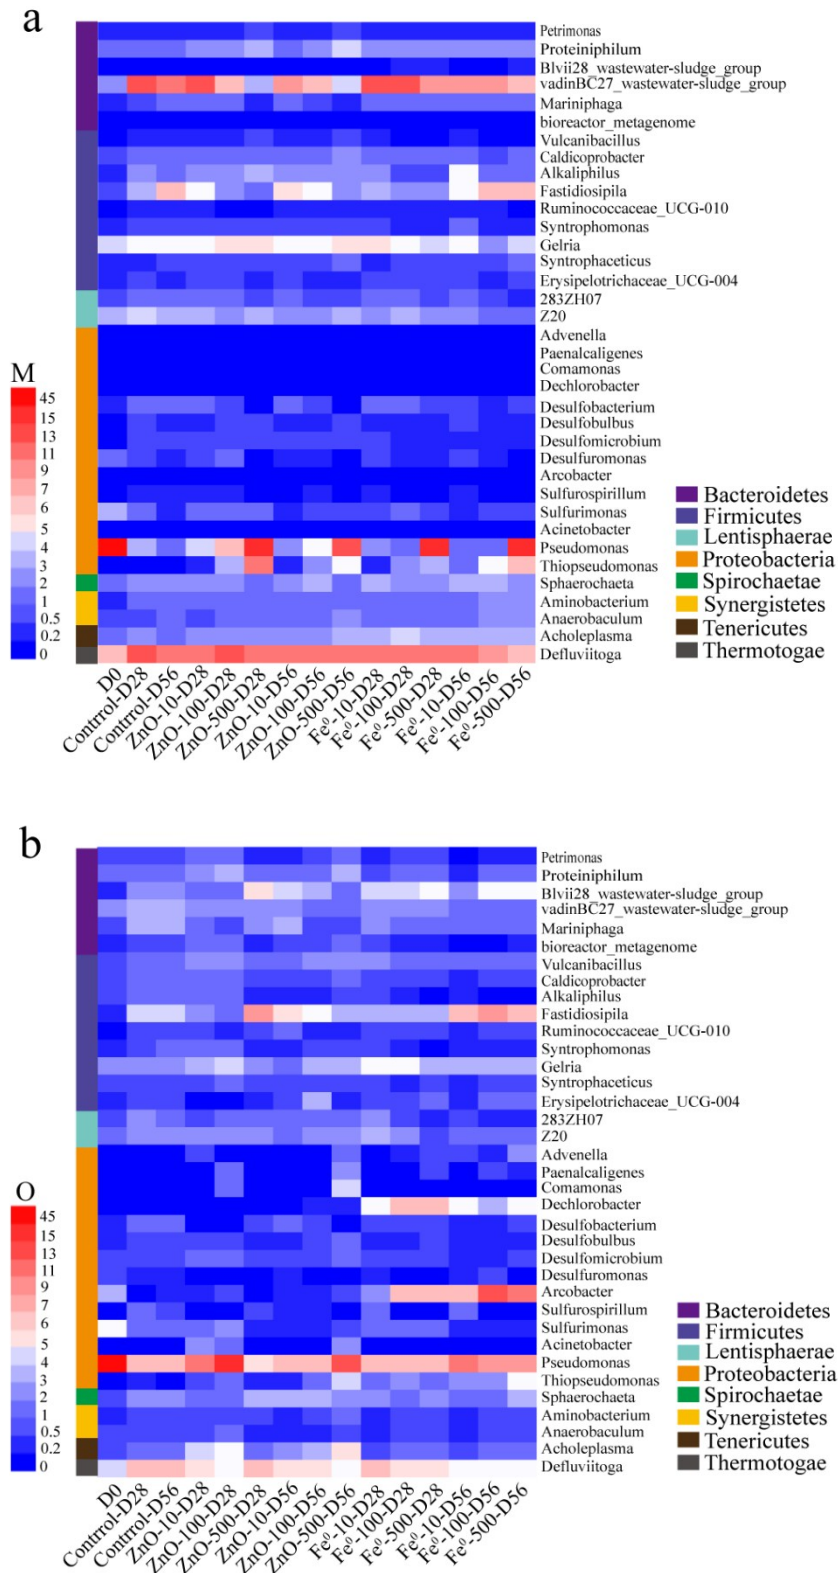

Figure S1 Relative abundance of bacteria at genera level in middle-aged (a) and old-aged (b) leachate with ZnO and Fe<sup>0</sup> NPs. Genera of any one sample with greater than 1% abundance are listed.

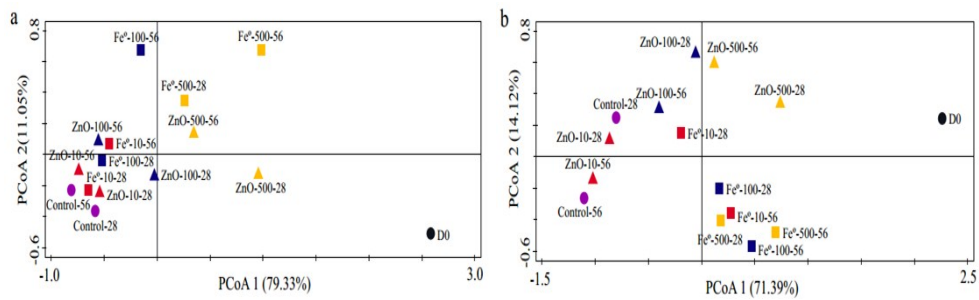

Figure S2 Principal coordinate analysis (PCoA) based on the Bray-Curtis distance showing the overall distribution of bacterial community composition in leachate with ZnO NPs (a) and Fe<sup>0</sup> NPs (b).

Table S3 Spearman correlations between absolute ARG and MGE abundances in leachate with ZnO and Fe<sup>0</sup> NPs.

|                            | ZnO NPs      |              | Fe <sup>0</sup> NPs |              |
|----------------------------|--------------|--------------|---------------------|--------------|
|                            | <i>intl1</i> | <i>intl2</i> | <i>intl1</i>        | <i>intl2</i> |
| <i>sul1</i>                | 0.623**      | 0.626**      | 0.724**             | 0.650**      |
| <i>sul2</i>                | 0.768**      | 0.359**      | 0.790**             | 0.435**      |
| <i>aadA1</i>               | 0.775**      | 0.652**      | 0.781**             | 0.530**      |
| <i>strB</i>                | 0.707**      | 0.498**      | 0.686**             | 0.609**      |
| <i>ermB</i>                | 0.032        | 0.360**      | 0.025               | 0.385**      |
| <i>mefA</i>                | -0.027       | 0.602**      | -0.051              | 0.683**      |
| <i>tetM</i>                | 0.006        | 0.258*       | 0.006               | 0.594**      |
| <i>tetQ</i>                | 0.052        | 0.310*       | 0.126               | 0.726**      |
| <i>bla<sub>OXA</sub></i>   | 0.366*       | -0.407**     | 0.417**             | -0.533**     |
| <i>bla<sub>CTX-M</sub></i> | -0.092       | 0.235*       | -0.172              | 0.484**      |

Values represent the correlation coefficient *R*-values derived from the Spearman correlation analysis. Significance levels are indicated: \**p* < 0.05, \*\**p* < 0.01, and \*\*\**p* < 0.001.

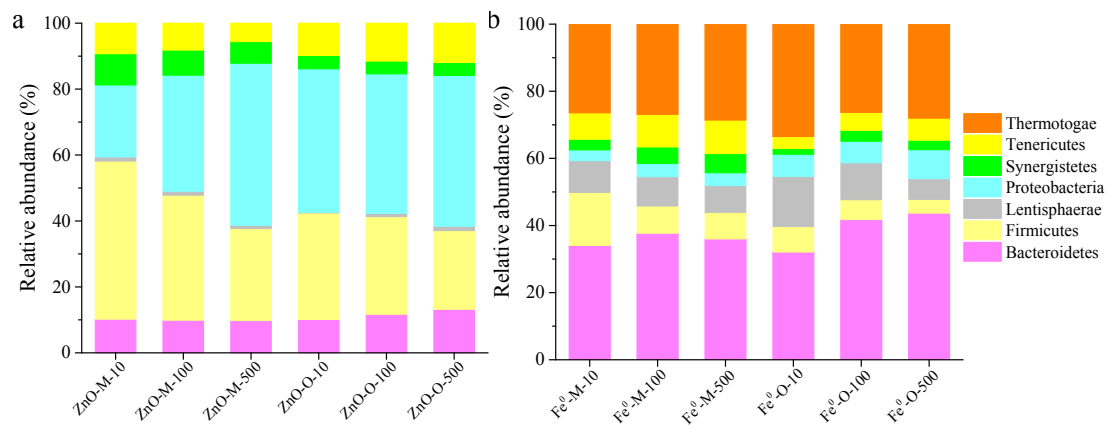

Figure S3 The relative abundances of potential ARG-associated host bacteria at phylum level in middle-aged (M) and old-aged (O) leachate with ZnO NPs (a) and Fe<sup>0</sup> NPs (b).



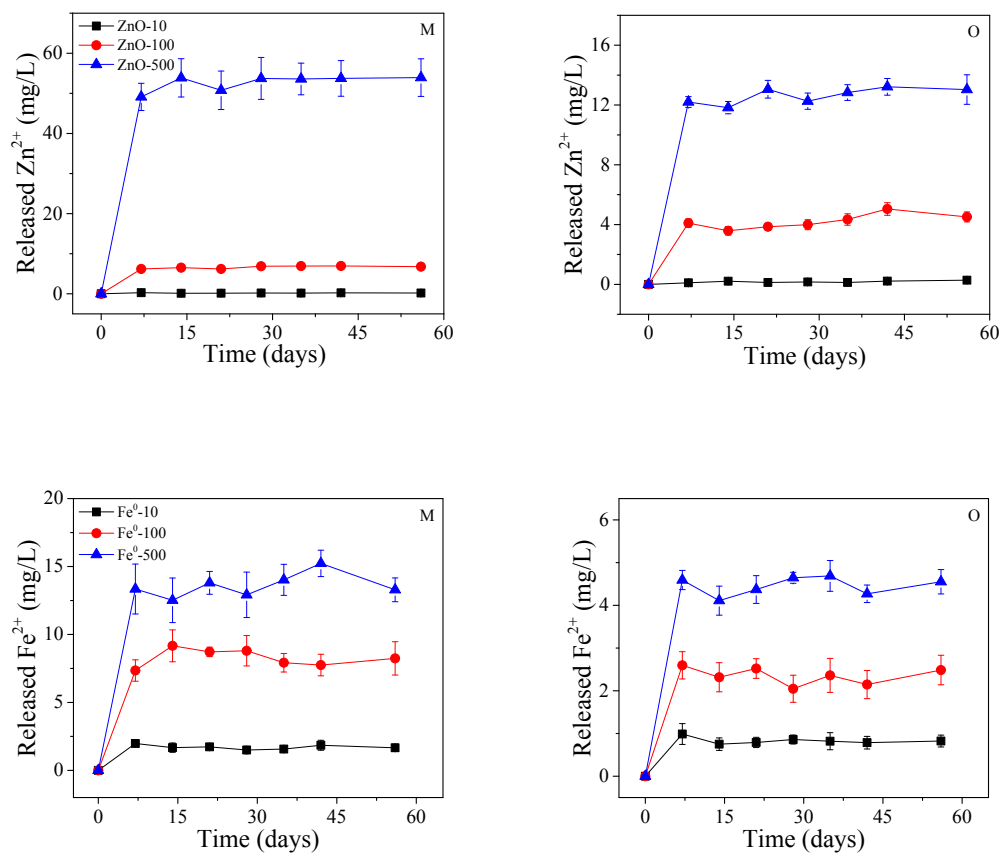

Figure S4 Changes of released ion concentrations from ZnO and Fe<sup>0</sup> NPs in middle-aged (M) and old-aged (O) leachate. Error bars represent one standard deviation of the mean from triplicate measurements.

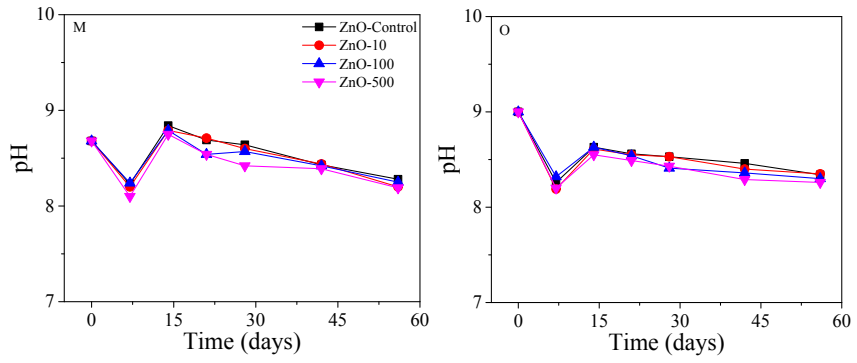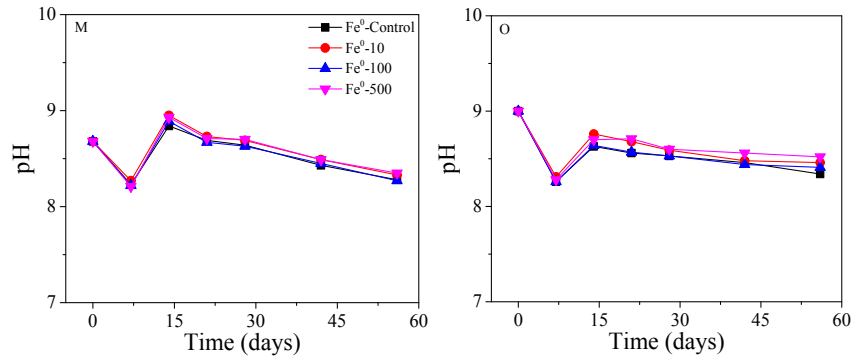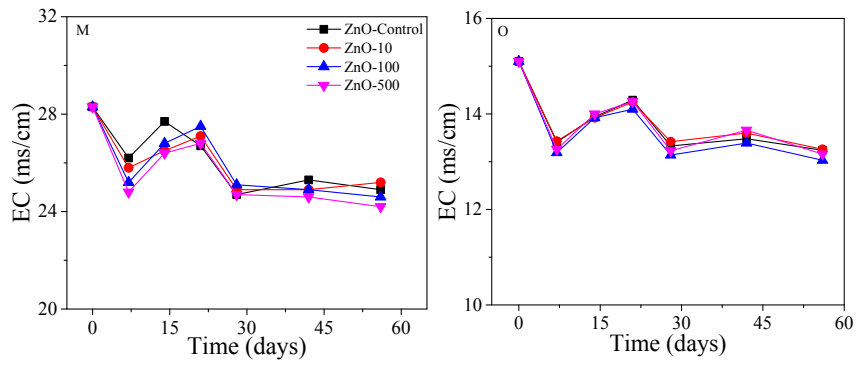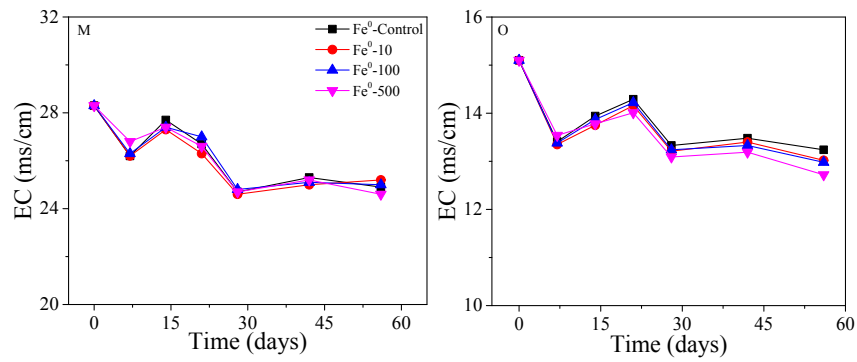

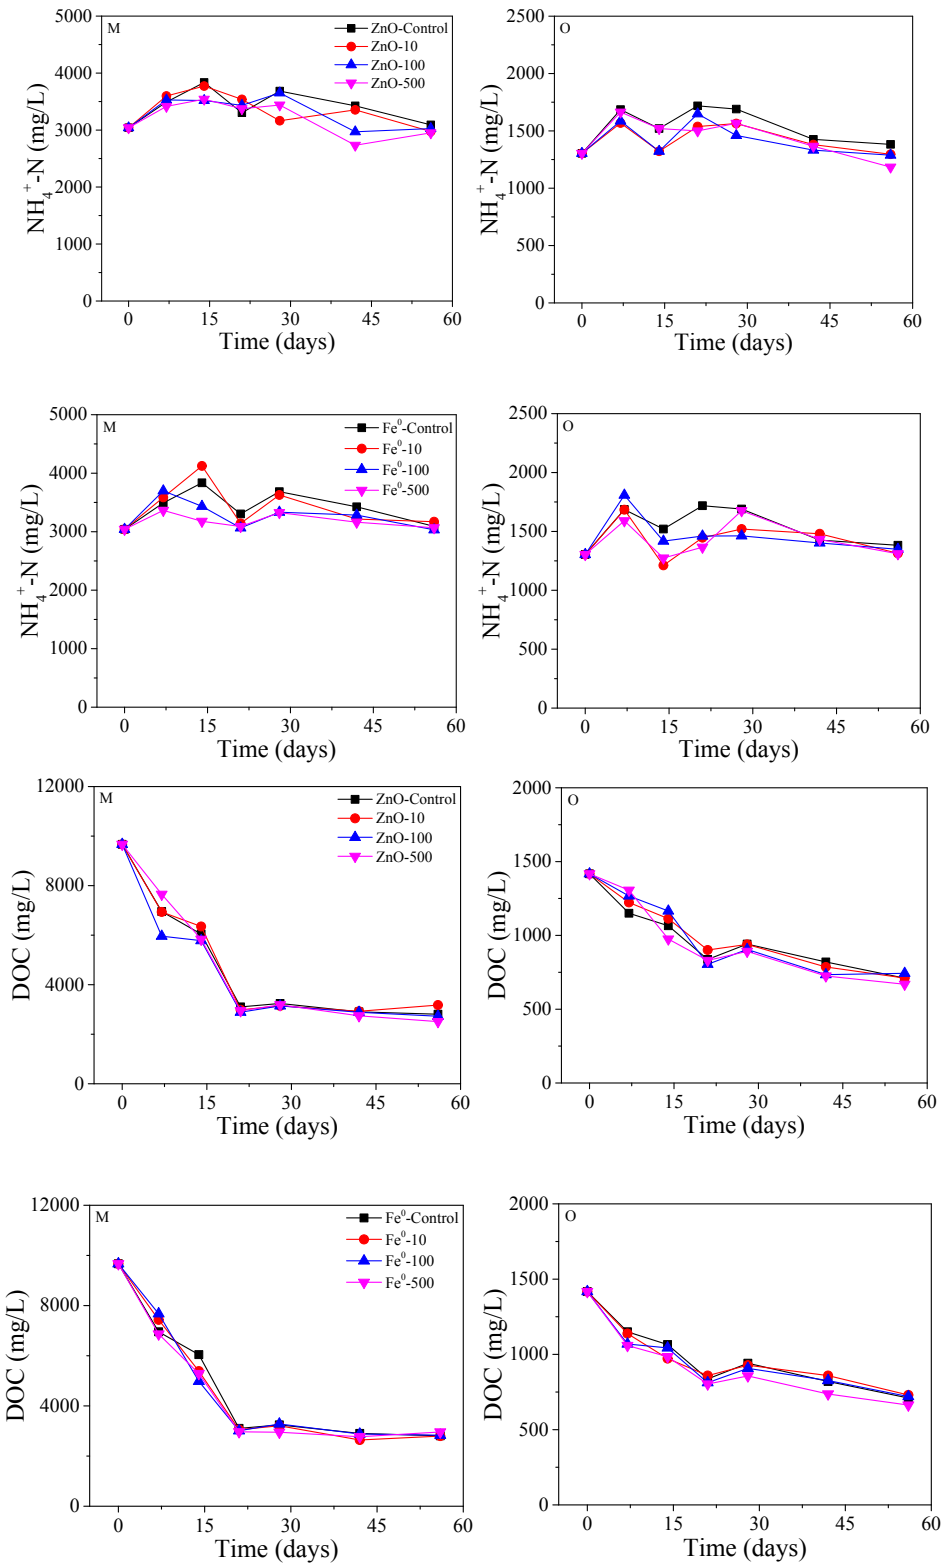

Figure S5 Changes of physicochemical properties (including pH, EC,  $\text{NH}_4^+\text{-N}$ , and DOC) in middle-aged (M) and old-aged (O) leachate with ZnO and  $\text{Fe}^0$  NPs. The values represent average amounts of triplicate tests.
